# Supplementary material for: Graphene enhanced carbon-coated tin dioxide nanoparticles for lithium-ion secondary batteries
Source: Royal Society of Chemistry journal article supplement (doi:10.1039/c4ta00361f), 2014-01-01
Supplement: c4ta00361f1.pdf [file c4ta00361f1.pdf]

Supporting Information for

## Graphene Enhanced Carbon-Coated Tin Dioxide Nanoparticles for Lithium-ion Secondary Battery

Zhongtao Li, Guiliang Wu, Dong Liu, Wenting Wu, Bo Jiang, JingtangZheng, Yanpeng Li,  
Junhua Li, Mingbo Wu\*

*State Key Laboratory of Heavy Oil Processing, China University of Petroleum, Qingdao  
266580, China*

\*Corresponding author. Tel.:+86 532 8698 3452. E-mail address: wumb@upc.edu.cn

As shown in Fig. S1(a), no obviously strong peaks can be noticed in the XRD pattern of SnO<sub>2</sub>/C-50 sample. However, just as reported in the paper, there are four sharp peaks in the sample of SnO<sub>2</sub>/C/GN-1.5, suggesting its high crystallinity due to the introduction of GO.

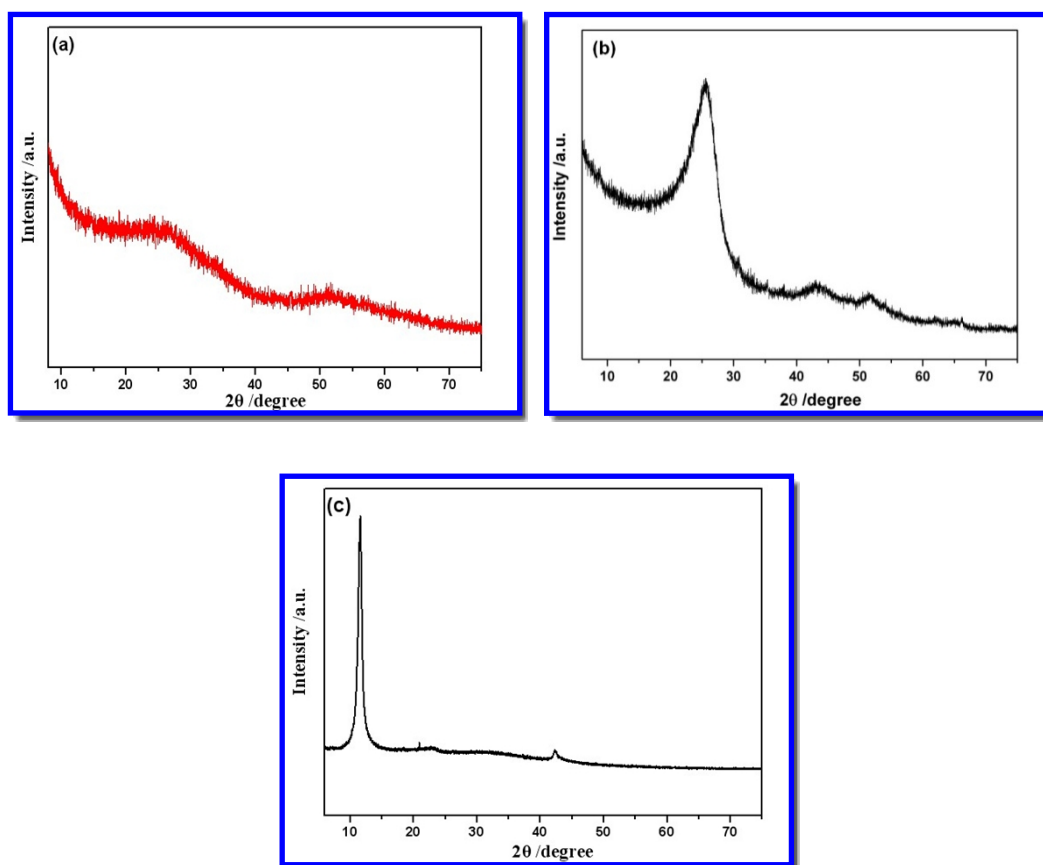

Fig. S1. XRD patterns of (a) SnO<sub>2</sub>/C-50, (b) C/GN and (c) graphite oxide

The FT-IR spectrum of SnO<sub>2</sub> is revealed in Fig. S2(a), a strong peak at 600 cm<sup>-1</sup> can be ascribed to Sn-O.

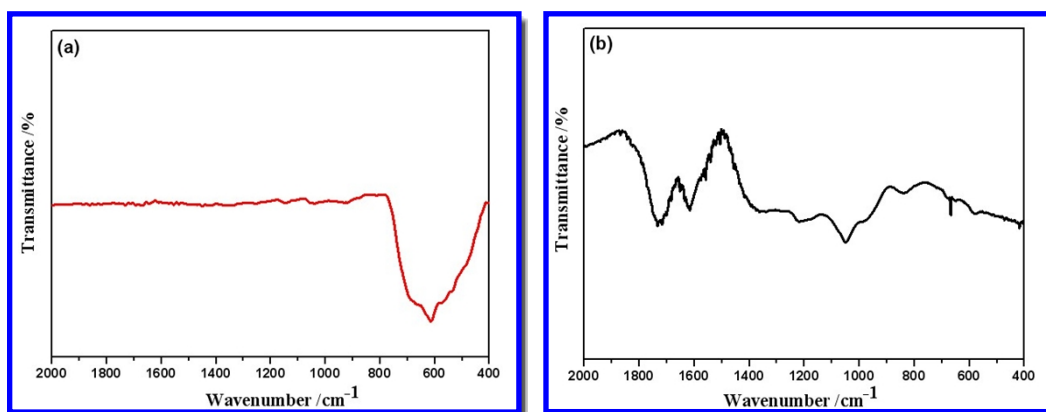

Fig. S2. FT-IR spectra of (a) SnO<sub>2</sub> and (b) graphite oxide

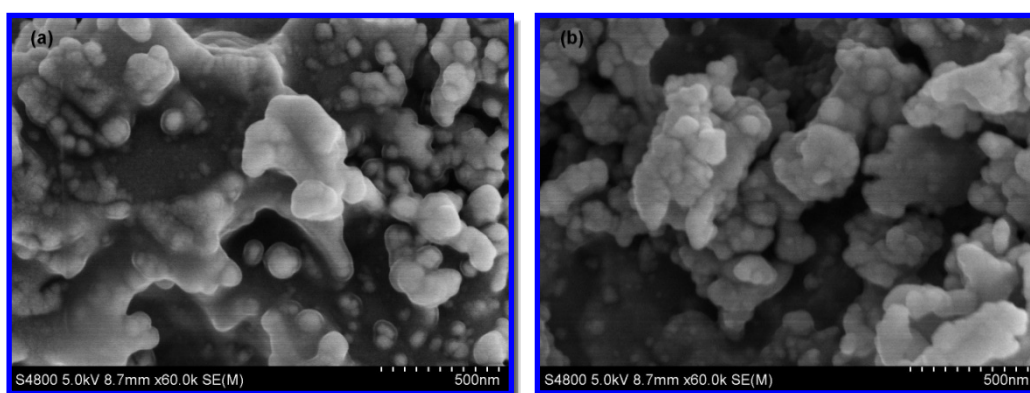

Fig. S3. SEM images of (a) SnO<sub>2</sub>/C-50 and (b) SnO<sub>2</sub>/C/GN-1.5

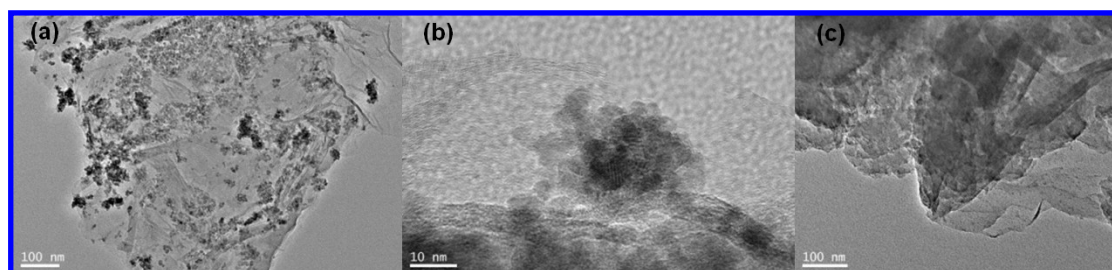

Fig. S4. TEM images of (a) SnO<sub>2</sub>/GN, (c) C/GN and HRTEM image of (b) SnO<sub>2</sub>/GN

The rate capability of SnO<sub>2</sub>/C/GN-1.5 is evaluated by charging/discharging at various current densities from 100 to 800 mA g<sup>-1</sup> (Fig. S5(a)). It is obvious that the sample shows excellent cyclic capacity retention at each current density except 800 mA g<sup>-1</sup>. Remarkably, at a current density of 400 mA g<sup>-1</sup>, SnO<sub>2</sub>/C/GN-1.5 delivers a high capacity of 560 mAh g<sup>-1</sup>. Importantly, after the high-current-density measurements, the capacity of the SnO<sub>2</sub>/C/GN-1.5 at 100 mA g<sup>-1</sup> can recover to the initial value, indicating its high reversibility.

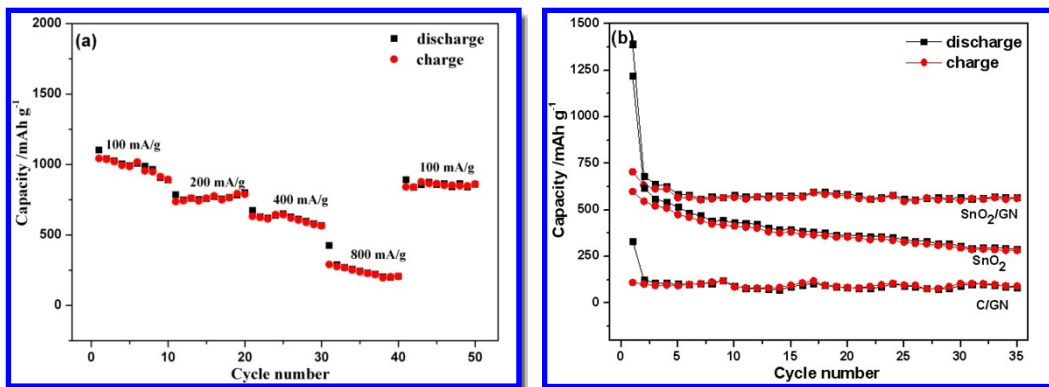

Fig. S5. (a) Rate performance of SnO<sub>2</sub>/C/GN-1.5 and (b) the cyclic performance of SnO<sub>2</sub>/GN, SnO<sub>2</sub> and C/GN
